# Supplementary material for: Thermoregulatory Responses and Performance of Dairy Calves Fed Different Amounts of Colostrum
Source: MDPI journal article supplement (doi:10.3390/ani11030703), 2021-03-05
Supplement: s1 [file s1]

## Supplementary Material

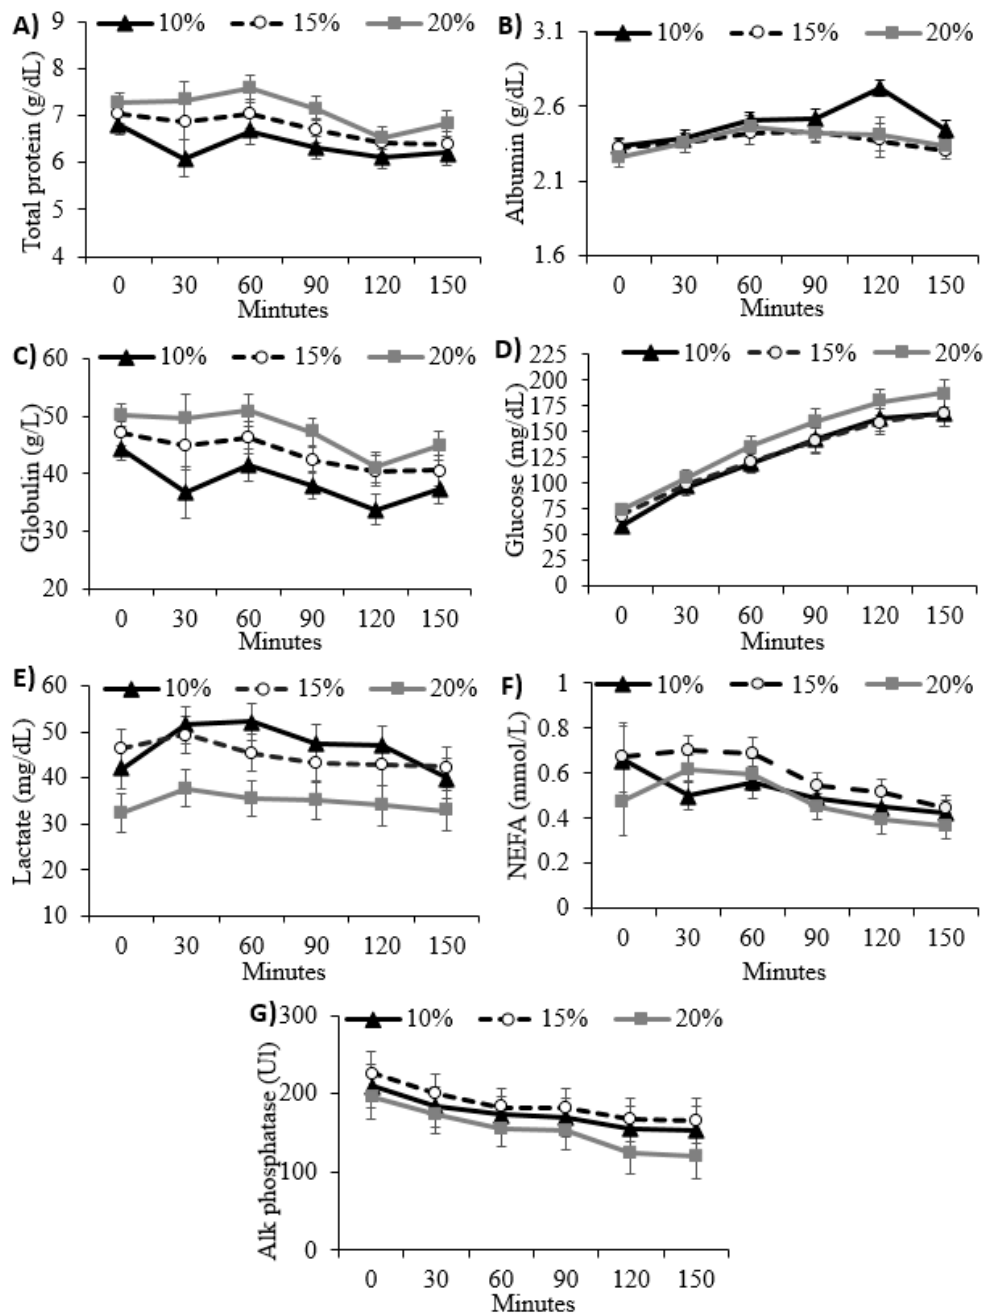

**Figure S1** Rectal and the skin surface temperature across time during a cold challenge of newborn dairy calves fed different volume of colostrum. 10% BW as colostrum (n = 10); 15% BW as colostrum (n = 10); 20% BW as colostrum (n = 10). (A) Rectal temperature; Average (10% = 37.7<sup>b</sup>, 15% = 38.1<sup>a</sup>, 20% = 38.0<sup>a</sup>; SEM 0.08), treatment effect (P = 0.06), time effect (P < 0.001) and treatment by time effect interaction (P = 0.32). (B) Ear; Average (10% = 19.4,

15% = 19.9, 20% = 20.8; SEM 1.14), treatment effect ( $P = 0.66$ ), time effect ( $P < 0.001$ ) and treatment by time effect interaction ( $P = 0.72$ ). (C) Prescapular; Average (10% = 30.1<sup>b</sup>, 15% = 30.7<sup>ab</sup>, 20% = 31.9<sup>a</sup>; SEM 0.6), treatment effect ( $P = 0.09$ ), time effect ( $P = 0.11$ ) and treatment by time effect interaction ( $P = 0.54$ ). (D) Thorax wall; Average (10% = 32.5, 15% = 33.0, 20% = 33.4; SEM 0.45), treatment effect ( $P = 0.36$ ), time effect ( $P < 0.001$ ) and treatment by time effect interaction ( $P = 0.83$ ). (E) Thigh; Average (10% = 30.5, 15% = 30.0, 20% = 30.6; SEM 1.1), treatment effect ( $P = 0.87$ ), time effect ( $P < 0.001$ ) and treatment by time effect interaction ( $P = 0.97$ ). (F) Shin; Average (10% = 26.0, 15% = 27.8, 20% = 27.8; SEM 0.93), treatment effect ( $P = 0.23$ ), time effect ( $P < 0.001$ ) and treatment by time effect interaction ( $P = 0.62$ ). (G) Foot; Average (10% = 23.2, 15% = 26.8, 20% = 24.6; SEM 1.14), treatment effect ( $P = 0.11$ ), time effect ( $P < 0.001$ ) and treatment by time effect interaction ( $P = 0.11$ ). (H) Tail; Average (10% = 19.4, 15% = 22.5, 20% = 20.9; SEM 1.18), treatment effect ( $P = 0.18$ ), time effect ( $P < 0.001$ ) and treatment by time effect interaction ( $P = 0.34$ ).

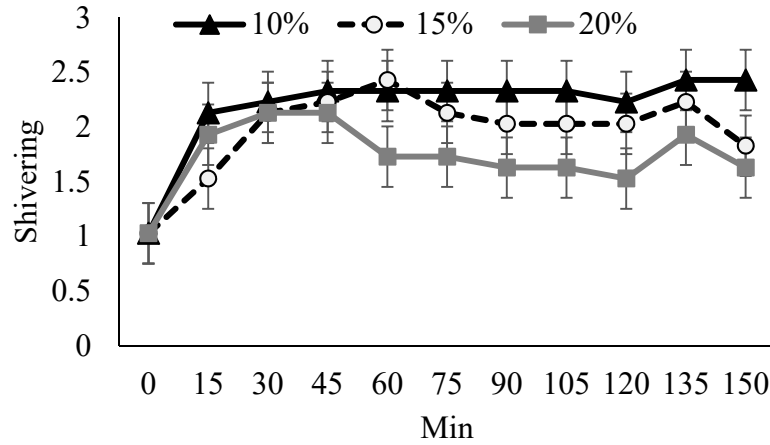

**Figure S2** Shivering across time, during a cold challenge of newborn dairy calves fed different volume of colostrum. 10% BW as colostrum (n = 10); 15% BW as colostrum (n = 10); 20% BW as colostrum (n = 10). Average (10% = 2.2<sup>a</sup>, 15% = 2.0<sup>ab</sup>, 20% = 1.7<sup>b</sup>; SEM 0.19), treatment effect (P = 0.10), time effect (P < 0.001), treatment by time effect interaction (P = 0.77).

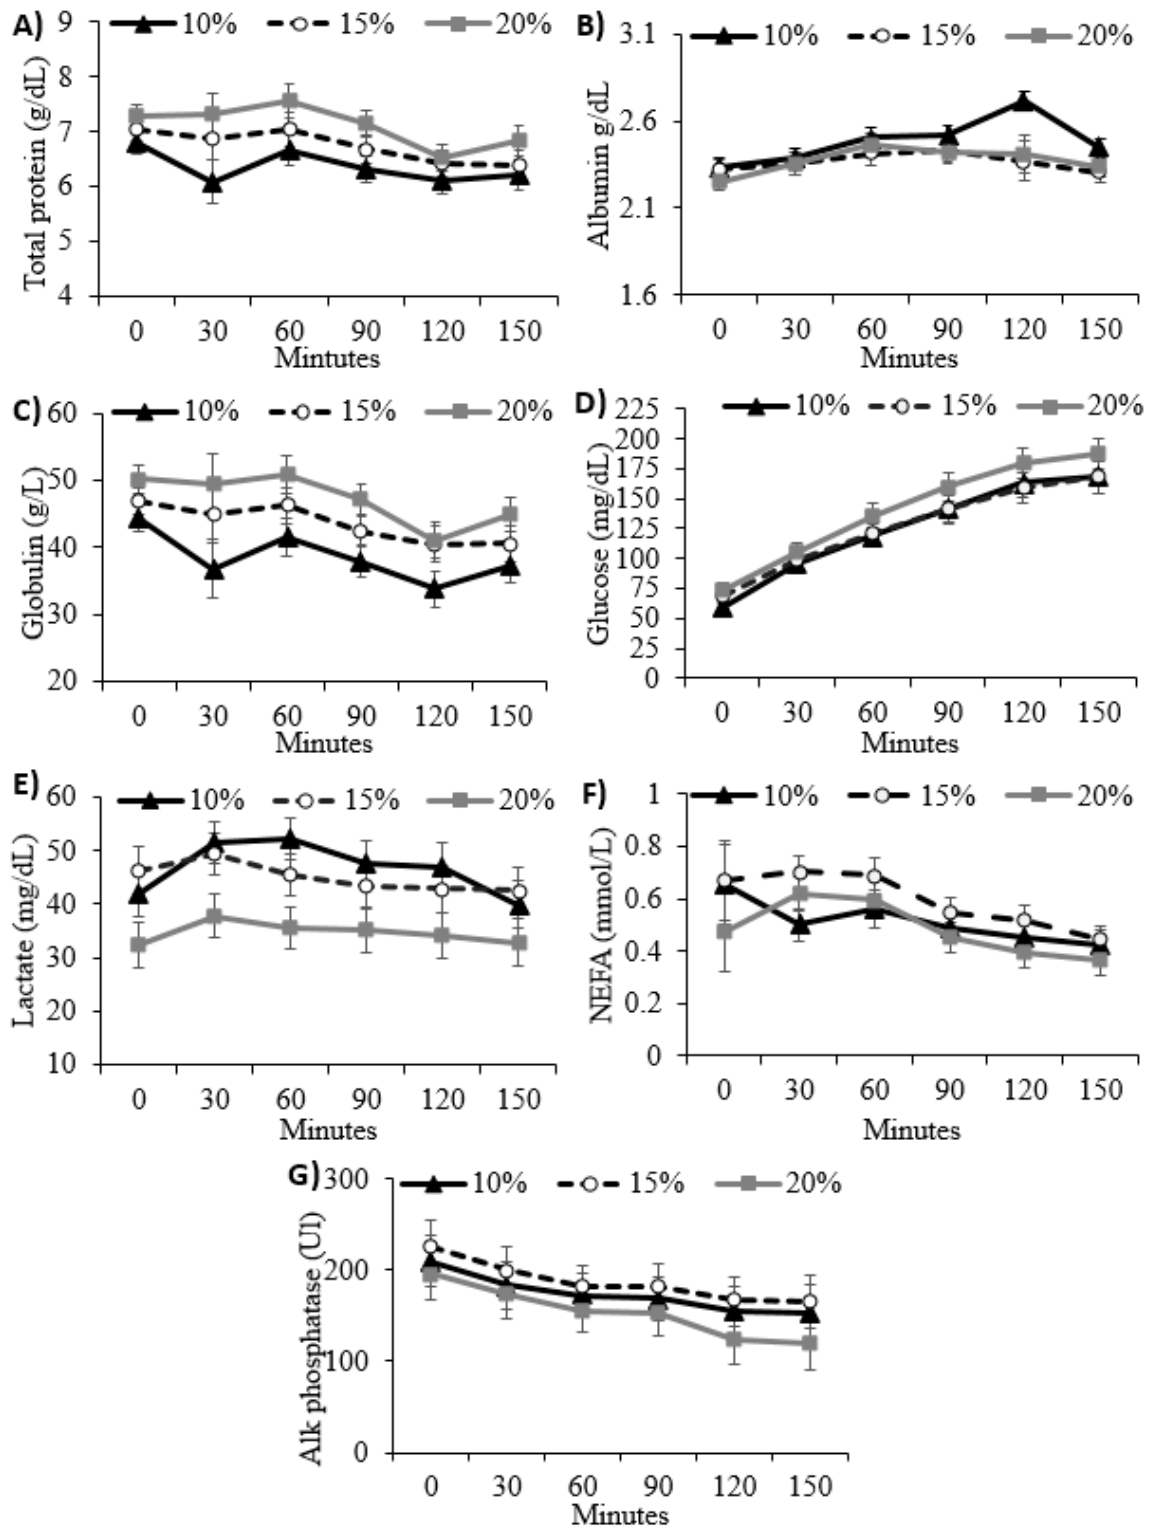

**Figure S3** Blood metabolites of newborn dairy calves fed different volume of colostrum, across time effect during a cold challenge. 10% BW as colostrum (n = 10); 15% BW as colostrum (n = 10); 20% BW as colostrum (n = 10). (A) Total protein; Average (10% = 6.4<sup>b</sup>, 15% = 6.7<sup>ab</sup>, 20% = 7.1<sup>a</sup>; SEM 0.23), treatment

effect ( $P = 0.09$ ), time effect ( $P < 0.001$ ), treatment by time effect interaction ( $P = 0.86$ ). (B) Albumin; Average (10% = 2.5<sup>a</sup>, 15% = 2.4<sup>b</sup>, 20% = 2.4<sup>b</sup>; SEM 0.05), linear effect ( $P = 0.06$ ), quadratic effect ( $P = 0.21$ ), treatment effect ( $P = 0.08$ ), time effect ( $P = 0.01$ ), treatment by time effect interaction ( $P = 0.48$ ). (C) Globulin; Average (10% = 38.6<sup>b</sup>, 15% = 43.6<sup>ab</sup>, 20% = 47.3<sup>a</sup>; SEM 2.20), treatment effect ( $P = 0.03$ ), time effect ( $P < 0.001$ ), treatment by time effect interaction ( $P = 0.92$ ). (D) Glucose; Average (10% = 125.6, 15% = 127.1, 20% = 141.3; SEM 8.51), treatment effect ( $P = 0.34$ ), time effect ( $P < 0.001$ ), treatment by time effect interaction ( $P = 0.90$ ). (E) Lactate; Average (10% = 46.7<sup>a</sup>, 15% = 44.9<sup>a</sup>, 20% = 34.6<sup>b</sup>; SEM 3.85), treatment effect ( $P = 0.07$ ), time effect ( $P = 0.03$ ), treatment by time effect interaction ( $P = 0.17$ ). (F) NEFA; Average (10% = 0.5, 15% = 0.6, 20% = 0.5; SEM 0.05), treatment effect ( $P = 0.20$ ), time effect ( $P < 0.001$ ), treatment by time effect interaction ( $P = 0.73$ ). (G) Alkaline phosphatase; Average (10% = 174.1, 15% = 187.1, 20% = 153.7; SEM 23.7), treatment effect ( $P = 0.33$ ), time effect ( $P < 0.001$ ), treatment by time effect interaction ( $P = 1.00$ ).

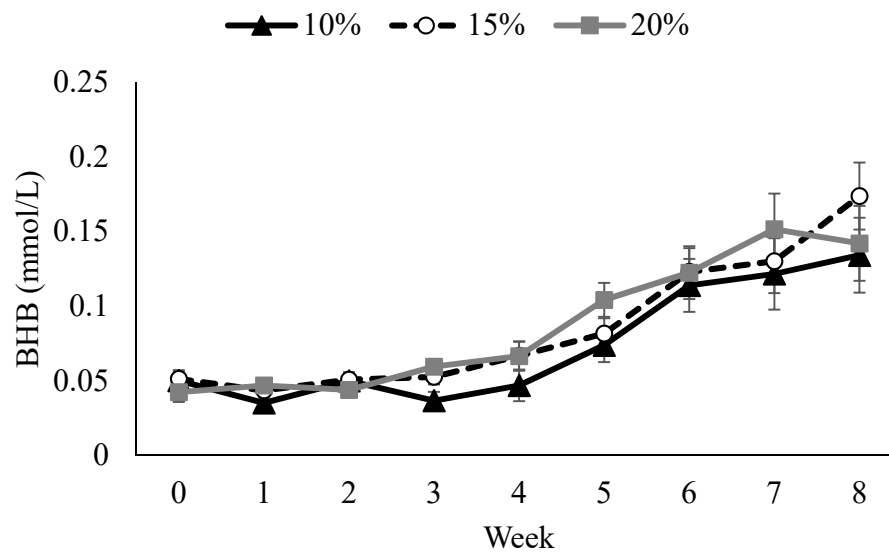

**Figure S4** Preweaning beta-hydroxybutyrate concentrations of dairy calves fed different volumes of colostrum at birth. 10% BW as colostrum (n = 10); 15% BW as colostrum (n = 10); 20% BW as colostrum (n = 10). Treatment effect ( $P < 0.09$ ) Age effect ( $P < 0.001$ ) and treatment by age interaction ( $P = 0.50$ ).
